# Supplementary material for: The Impact of Molecular Subtyping on Pathological Staging of Pancreatic Cancer
Source: PubMed Central journal article supplement (PMC9831035; doi:10.1097/sla.0000000000005050), 2023-01-10
Supplement: sla-277-e396-s001.pdf [file sla-277-e396-s001.pdf]

**Supplementary File:****The impact of molecular subtyping on pathological staging of Pancreatic Cancer**

Stephan B Dreyer<sup>1,2 MD, PhD</sup>, Sarah Rae<sup>1 BMSc</sup>, Kirsty Bisset<sup>2 MD</sup>, Rosie Upstill-Goddard<sup>1 PhD</sup>, Georgios Gemenetzi<sup>2 MD</sup>, Amber L. Johns<sup>3 BSc</sup>, Australian Pancreatic Cancer Genome Initiative<sup>3</sup>, Glasgow Precision Oncology Laboratory<sup>1</sup>, Euan J. Dickson<sup>2 MD</sup>, Anubhav Mittal<sup>4, 5 MD PhD</sup>, Anthony J. Gill<sup>3,6,7 MD, PhD</sup>, Fraser Duthie<sup>1, 8 MD, PhD</sup>, Antonio Pea<sup>1,9 MD, PhD</sup>, Rita T. Lawlor<sup>10 PhD</sup>, Aldo Scarpa<sup>10,11 MD, PhD</sup>, Roberto Salvia<sup>9 MD</sup>, Alessandra Pulvirenti<sup>12 MD</sup>, Alessandro Zerbi<sup>12,13 MD</sup>, Federica Marchesi<sup>14, 15 PhD</sup>, Colin J. McKay<sup>1,2 MD</sup>, Andrew V. Biankin<sup>1,2 MD, PhD</sup>, Jaswinder S. Samra<sup>4, 5 MD</sup>, David K. Chang<sup>\*1,2 MD, PhD</sup> and Nigel B Jamieson<sup>\*1,2,4 MD, PhD</sup>

<sup>1</sup>Wolfson Wohl Cancer Research Centre, Institute of Cancer Sciences, University of Glasgow, Gartnavel Estate, Switchback Road, Bearsden, Glasgow, Scotland G61 1QH, United Kingdom ; <sup>2</sup>West of Scotland Pancreatic Unit, Glasgow Royal Infirmary, Glasgow G31 2ER UNITED KINGDOM; <sup>3</sup>The Kinghorn Cancer Centre, 370 Victoria Street, Darlinghurst and Garvan Institute of Medical Research, Sydney, NSW 2010, AUSTRALIA; <sup>4</sup>Department of Surgery, Royal North Shore Hospital, St Leonards, Sydney NSW 2065, Australia; <sup>5</sup>University of Sydney, Sydney, NSW 2006, Australia; <sup>6</sup>Cancer Diagnosis and Pathology Group Kolling Institute of Medical Research and Department of Anatomical Pathology, Royal North Shore Hospital. Sydney NSW 2065, AUSTRALIA; <sup>7</sup>Northern Clinical School, Faculty of Medicine, University of Sydney, AUSTRALIA; <sup>8</sup>Department of Pathology, Queen Elizabeth University Hospital, Glasgow, G51 4TF, UNITED KINGDOM; <sup>9</sup> General and Pancreatic Surgery Department, Pancreas Institute, University and Hospital Trust of Verona, Verona, ITALY; <sup>10</sup>ARC-Net Research Centre, University and Hospital Trust of Verona, Verona, ITALY; <sup>11</sup>Department of Diagnostics and Public Health, University and Hospital Trust of Verona, Verona, ITALY. <sup>12</sup>Pancreatic Surgery Unit, IRCCS Humanitas Research Hospital, Rozzano, Milan, ITALY; <sup>13</sup>Department of Biomedical Sciences, Humanitas University, Pieve Emanule, Milan, ITALY; <sup>14</sup>Department of Immunology, IRCCS Humanitas Research Hospital, Rozzano, ITALY; <sup>15</sup>Department of Medical Biotechnology and Translational Medicine, University of Milan, Milan, ITALY.

**Research Funding Support:**

- Wellcome Trust Senior Investigator Award: 103721/Z/14/Z
- Cancer Research UK Programme: C29717/A17263 and C29717/A18484
- Cancer Research UK Glasgow Centre: C596/A18076
- Cancer Research UK Clinical Training Award: C596/A20921
- Cancer Research UK Clinician Scientist Award: C55370/A25813
- The National Health & Medical Research Council of Australia, The Cancer Council NSW, Cancer Institute NSW, Royal Australasian College of Surgeons, St Vincent's Clinic Foundation and R. T. Hall Trust.
- The Australian Pancreatic Cancer Foundation
- Associazione Italiana Ricerca Cancro (AIRC 5x1000 n. 12182);
- Fondazione Italiana Malattie Pancreas – Ministero Salute [FIMPCUP\_J38D19000690001]
- Fondazione Cariverona: Oncology Biobank Project “Antonio Schiavi” (prot. 203885/2017)
- IG2020-24393-Associazione Italiana per la Ricerca su Cancro

**Corresponding authors:****Nigel B Jamieson**

Wolfson Wohl Cancer Research Centre,  
Institute of Cancer Sciences, University of Glasgow,  
Garscube Estate, Switchback Road,  
Bearsden, Glasgow Scotland G61 1BD  
Tel: +44 141 330 5670 Fax: +44 141 330 5834  
Email: [nigel.jamieson@glasgow.ac.uk](mailto:nigel.jamieson@glasgow.ac.uk)

**David K. Chang**

Wolfson Wohl Cancer Research Centre,  
Institute of Cancer Sciences, University of Glasgow,  
Garscube Estate, Switchback Road,  
Bearsden, Glasgow Scotland G61 1BD  
Tel: +44 141 330 7589 Fax: +44 141 330 5834  
Email: [david.chang@glasgow.ac.uk](mailto:david.chang@glasgow.ac.uk)

**Running Head:** Staging Pancreatic Cancer in era of molecular subtyping

**Keywords:** Pancreatic Cancer, Molecular Subtyping, Cancer Staging

**Conflicts of Interest:** There are no conflicts of interests to declare in relevance to this piece of work

**Garvan Institute of Medical Research** Amber L. Johns<sup>1</sup>, Anthony J Gill<sup>1, 5</sup>, Lorraine A. Chantrill<sup>1,22</sup>, Paul Timpson<sup>1</sup>, Angela Chou<sup>1,5</sup>, Marina Pajic<sup>1</sup>, Tanya Dwart<sup>1</sup>, David Hermann<sup>1</sup>, Claire Vennin<sup>1</sup>, Thomas R Cox<sup>1</sup>, Brooke Pereira<sup>1</sup>, Shona Ritchie<sup>1</sup>, Daniel A Reed<sup>1</sup>, Cecilia R Chambers<sup>1</sup>, Xanthe Metcalf<sup>1</sup>, Max Nobis<sup>1</sup>, **QIMR Berghofer Medical Research Institute** Nicola Waddell<sup>2</sup>, John V. Pearson<sup>2</sup>, Ann-Marie Patch<sup>2</sup>, Katia Nones<sup>2</sup>, Felicity Newell<sup>2</sup>, Pamela Mukhopadhyay<sup>2</sup>, Venkateswar Addala<sup>2</sup>, Stephen Kazakoff<sup>2</sup>, Oliver Holmes<sup>2</sup>, Conrad Leonard<sup>2</sup>, Scott Wood<sup>2</sup>. **University of Melbourne, Centre for Cancer Research** Sean M. Grimmond<sup>3</sup>, Oliver Hofmann<sup>3</sup>. **Royal North Shore Hospital** Jaswinder S. Samra<sup>5</sup>, Nick Pavlakis<sup>5</sup>, Jennifer Arena<sup>5</sup>, Hilda A. High<sup>5</sup>. **Bankstown Hospital** Ray Asghari<sup>6</sup>, Neil D. Merrett<sup>6</sup>, Amitabha Das<sup>6</sup>. **Liverpool Hospital** Peter H. Cosman<sup>7</sup>, Kasim Ismail<sup>7</sup>. **St Vincent's Hospital** Alina Stoita<sup>8</sup>, David Williams<sup>8</sup>, Allan Spigellman<sup>8</sup>. **Westmead Hospital** Vincent W. Lam<sup>9</sup>, Duncan McLeod<sup>9</sup>, Judy Kirk<sup>9</sup>. **Royal Prince Alfred Hospital, Chris O'Brien Lifehouse** James G. Kench<sup>10</sup>, Peter Grimison<sup>10</sup>, Charbel Sandroussi<sup>10</sup>, Annabel Goodwin<sup>7,10</sup>. **Prince of Wales Hospital** R. Scott Mead<sup>1,11</sup>, Katherine Tucker<sup>11</sup>, Lesley Andrews<sup>11</sup>. **Fiona Stanley Hospital** Michael Texler<sup>12</sup>, Cindy Forrest<sup>12</sup>, Mo Ballal<sup>12,13</sup>, David Fletcher<sup>12</sup>. **St John of God Healthcare** Maria Beilin<sup>13</sup>, Kynan Feeney<sup>13</sup>, Krishna Epari<sup>13</sup>, Sanjay Mukhedkar<sup>13</sup>. **Epworth HealthCare** Nikolajs Zeps<sup>23</sup>. **Royal Adelaide Hospital** Nan Q Nguyen<sup>14</sup>, Andrew R. Ruskiewicz<sup>14</sup>, Chris Worthley<sup>14</sup>. **Flinders Medical Centre** John Chen<sup>15</sup>, Mark E. Brooke-Smith<sup>15</sup>, Virginia Papangelis<sup>15</sup>. **Envoi Pathology** Andrew D. Clouston<sup>16</sup>. **Princess Alexandra Hospital** Andrew P. Barbour<sup>17</sup>, Thomas J. O'Rourke<sup>17</sup>, Jonathan W. Fawcett<sup>17</sup>, Kellee Slater<sup>17</sup>, Michael Hatzifotis<sup>17</sup>, Peter Hodgkinson<sup>17</sup>. **Austin Hospital** Mehrdad Nikfarjam<sup>18</sup>. **Johns Hopkins Medical Institutes** James R. Eshleman<sup>19</sup>, Ralph H. Hruban<sup>19</sup>, Christopher L. Wolfgang<sup>19</sup>. **ARC-Net Centre for Applied Research on Cancer** Aldo Scarpa<sup>20</sup>, Rita T. Lawlor<sup>20</sup>, Vincenzo Corbo<sup>20</sup>, Claudio Bassi<sup>20</sup>. **University of Glasgow** Andrew V Biankin<sup>21</sup>, Nigel B. Jamieson<sup>21</sup>, David K. Chang<sup>1, 21</sup>, Stephan B. Dreyer<sup>21</sup>.

<sup>1</sup>The Kinghorn Cancer Centre, Garvan Institute of Medical Research, 370 Victoria Street, Darlinghurst, Sydney, New South Wales 2010, Australia.

<sup>2</sup>QIMR Berghofer Medical Research Institute, 300 Herston Rd, Herston, Queensland 4006, Australia.

<sup>3</sup>University of Melbourne, Centre for Cancer Research, Victorian Comprehensive Cancer Centre, 305 Grattan Street, Melbourne, Victoria 3000, Australia.

<sup>4</sup> Institute for Molecular Bioscience, University of QLD, St Lucia, Queensland 4072, Australia.

<sup>5</sup>Royal North Shore Hospital, Westbourne Street, St Leonards, New South Wales 2065, Australia.

<sup>6</sup>Bankstown Hospital, Eldridge Road, Bankstown, New South Wales 2200, Australia.

<sup>7</sup>Liverpool Hospital, Elizabeth Street, Liverpool, New South Wales 2170, Australia.

<sup>8</sup> St Vincent's Hospital, 390 Victoria Street, Darlinghurst, New South Wales, 2010 Australia.

<sup>9</sup>Westmead Hospital, Hawkesbury and Darcy Roads, Westmead, New South Wales 2145, Australia.

<sup>10</sup>Royal Prince Alfred Hospital, Missenden Road, Camperdown, New South Wales 2050, Australia.

<sup>11</sup>Prince of Wales Hospital, Barker Street, Randwick, New South Wales 2031, Australia.

<sup>12</sup>Fremantle Hospital, Alma Street, Fremantle, Western Australia 6959, Australia.

<sup>13</sup> St John of God Healthcare, 12 Salvado Road, Subiaco, Western Australia 6008, Australia.

<sup>14</sup> Royal Adelaide Hospital, North Terrace, Adelaide, South Australia 5000, Australia.

<sup>15</sup> Flinders Medical Centre, Flinders Drive, Bedford Park, South Australia 5042, Australia.

<sup>16</sup> Envoi Pathology, 1/49 Butterfield Street, Herston, Queensland 4006, Australia.

<sup>17</sup> Princess Alexandra Hospital, Cornwall Street & Ipswich Road, Woolloongabba, Queensland 4102, Australia.

<sup>18</sup> Austin Hospital, 145 Studley Road, Heidelberg, Victoria 3084, Australia.

<sup>19</sup> Johns Hopkins Medical Institute, 600 North Wolfe Street, Baltimore, Maryland 21287, USA.

<sup>20</sup> ARC-NET Center for Applied Research on Cancer, University of Verona, Via dell'Artigliere, 19 37129 Verona, Province of Verona, Italy.

<sup>21</sup> Wolfson Wohl Cancer Research Centre, Institute of Cancer Sciences, University of Glasgow, Garscube Estate, Switchback Road, Bearsden, Glasgow, Scotland G61 1BD, United Kingdom.

<sup>22</sup> Wollongong Hospital, Illawarra and Shoalhaven Local Health District, Loftus Street, Wollongong NSW 2500.

<sup>23</sup> Epworth HealthCare, 89 Bridge Rd, Richmond VIC 3121, Australia

### **Ethics approval numbers**

- Sydney Local Health District (RPA Zone) : Approval number X16-0293
- University of Melbourne Health Sciences Human Ethics Subcommittee: Approval Number 1748955.
- North Shore Private Hospital Ethics Committee: Approval number NSPHEC 2016-016.
- Garvan Institute of Medical Research Approval number 1627.

- West of Scotland Research Ethics Service (WoSRES) committee, NHS Greater Glasgow and Clyde-Molecular profiling of pancreatic cancer for improved prediction of Survival. Research Ethics Committee reference number: 07/S0704/26
- Ethics approval for Royal North Shore Hospital cohort was obtained from Northern Sydney Local Health District Human Research and Ethics Committee (NSLHD HREC HREC/16/HAWKE/105).
- Protocol number ICH-595, Humanitas Research Hospital, Milan

All data was transferred under the premise of approved data transfer agreements between the institutions and the University of Glasgow.

**Supplementary Tables**

Supplementary Table 1: Patient characteristics for the Glasgow, APCI, RNSH and Milan Cohorts

|                                      | Glasgow Cohort     |                           |                          | APCI Cohort        |                           |                          | Royal North Shore Cohort |                           |                          | Verona Cohort      |                           |                              | Milan Cohort      |                           |                          |
|--------------------------------------|--------------------|---------------------------|--------------------------|--------------------|---------------------------|--------------------------|--------------------------|---------------------------|--------------------------|--------------------|---------------------------|------------------------------|-------------------|---------------------------|--------------------------|
| Variables                            | n = 366<br>No. (%) | Median<br>DSS<br>(months) | Pvalue<br>(Log-<br>rank) | n = 518<br>No. (%) | Median<br>DSS<br>(months) | Pvalue<br>(Log-<br>rank) | n = 283<br>No. (%)       | Median<br>DSS<br>(months) | Pvalue<br>(Log-<br>rank) | n = 103<br>No. (%) | Median<br>DSS<br>(months) | P<br>value<br>(Log-<br>rank) | n = 28<br>No. (%) | Median<br>DSS<br>(months) | Pvalue<br>(Log-<br>rank) |
| <b>Sex</b>                           |                    |                           |                          |                    |                           |                          |                          |                           |                          |                    |                           |                              |                   |                           |                          |
| Male                                 | 192 (52.5)         | 23.7                      | 0.339                    | 258 (49.8)         | 18.7                      | 0.573                    | 151 (53.4)               | 27.7                      | 0.677                    | 49 (47.6)          | 28.0                      | 0.798                        | 12 (42.8)         | 25.0                      | 0.189                    |
| Female                               | 174 (47.5)         | 25.7                      |                          | 260 (50.2)         | 21.0                      |                          | 132 (46.6)               | 34.1                      |                          | 54 (52.4)          | 30.0                      |                              | 16 (57.2)         | 12.0                      |                          |
| <b>Age (years)</b>                   |                    |                           |                          |                    |                           |                          |                          |                           |                          |                    |                           |                              |                   |                           |                          |
| Mean                                 | 63.0               |                           |                          | 66.7               |                           |                          | 67.1                     |                           |                          | 66.01              |                           |                              | 70.32             |                           |                          |
| Median                               | 64.3               |                           |                          | 68.0               |                           |                          | 68.4                     |                           |                          | 68.00              |                           |                              | 72.50             |                           |                          |
| Range                                | 30.8 – 86.0        |                           |                          | 28.0 – 88.0        |                           |                          | 33.9 – 91.3              |                           |                          | 37 – 87            |                           |                              | 43 – 85           |                           |                          |
| <b>Outcome</b>                       |                    |                           |                          |                    |                           |                          |                          |                           |                          |                    |                           |                              |                   |                           |                          |
| Follow-up (months)                   | 3.2 – 166.1        |                           |                          | 18.0–163.8         |                           |                          | 11.1 – 98.9              |                           |                          | 7.0 – 93.0         |                           |                              | 6 – 55            |                           |                          |
| Median follow up(months)             | 41.0               |                           |                          | 47.0               |                           |                          | 33.0                     |                           |                          | 56.5               |                           |                              | 17.5              |                           |                          |
| Death PDAC                           | 261                |                           |                          | 394 (76.1)         |                           |                          | 147                      |                           |                          | 64                 |                           |                              | 15 (53.6)         |                           |                          |
| Death other                          | 45                 |                           |                          | 31 (6.0)           |                           |                          | 12                       |                           |                          | 13                 |                           |                              | 0 (0.0)           |                           |                          |
| Death Unknown                        | -                  |                           |                          | 3 (0.6)            |                           |                          | -                        |                           |                          | -                  |                           |                              | 0 (0.0)           |                           |                          |
| Alive                                | 60                 |                           |                          | 89 (17.2)          |                           |                          | 123                      |                           |                          | 26                 |                           |                              | 13 (46.4)         |                           |                          |
| Lost to FU                           | -                  |                           |                          | 1 (0.1)            |                           |                          | -                        |                           |                          | 0                  |                           |                              | 0 (0.0)           |                           |                          |
| <b>Stage (AJCC 8<sup>th</sup>)</b>   |                    |                           |                          |                    |                           |                          |                          |                           |                          |                    |                           |                              |                   |                           |                          |
| CPR*                                 | 5 (1.4)            | NR                        | < 0.001                  | -                  |                           | <0.001                   | 6 (2.1)                  | NR                        | <0.001                   | 0 (0.0)            | -                         | 0.033                        | 0 (0.0)           | N/A                       | 0.150                    |
| IA                                   | 41 (11.2)          | 47.7                      |                          | 38 (7.3)           | 30.0                      |                          | 25 (8.8)                 | NR                        |                          | 4 (3.9)            | 55.0                      |                              | 1 (3.6)           |                           |                          |
| IB                                   | 36 (9.8)           | 26.7                      |                          | 94 (18.1)          | 19.6                      |                          | 46 (16.3)                | 34.9                      |                          | 7 (6.8)            | 32.0                      |                              | 4 (14.3)          |                           |                          |
| IIA                                  | 19 (5.2)           | 31.0                      |                          | 36 (6.9)           | 13.0                      |                          | 7 (2.5)                  | 78.6                      |                          | 3 (2.9)            | NR                        |                              | 2 (7.1)           |                           |                          |
| IIB                                  | 149 (40.7)         | 19.0                      |                          | 227 (43.8)         | 20.4                      |                          | 116 (41.0)               | 33.1                      |                          | 33 (32.0)          | 51.0                      |                              | 8 (28.6)          |                           |                          |
| III                                  | 116 (31.7)         | 22.4                      |                          | 108 (20.8)         | 17.0                      |                          | 83 (29.3)                | 23.9                      |                          | 56 (54.4)          | 22.0                      |                              | 13 (46.4)         |                           |                          |
| <b>T Stage (AJCC 8<sup>th</sup>)</b> |                    |                           |                          |                    |                           |                          |                          |                           |                          |                    |                           |                              |                   |                           |                          |
| CPR*                                 | 5 (1.4)            | NR                        | <0.001                   |                    |                           | <0.001                   | 6 (2.1)                  | NR                        | 0.011                    | 0 (0.0)            | -                         | 0.358                        | 0 (0.0)           |                           | 0.511                    |
| T1                                   | 81 (22.1)          | 39.0                      |                          | 101 (19.5)         | 34.4                      |                          | 48 (17.0)                | NR                        |                          | 33 (32.0)          | 30.0                      |                              | 4 (14.3)          | NR                        |                          |
| T2                                   | 207 (56.6)         | 22.6                      |                          | 292 (56.4)         | 18.6                      |                          | 175 (61.8)               | 30.5                      |                          | 56 (54.4)          | 28.0                      |                              | 13 (46.4)         | 14.0                      |                          |
| T3                                   | 73 (19.9)          | 13.5                      |                          | 119 (23.0)         | 13.2                      |                          | 53 (18.7)                | 27.6                      |                          | 14 (13.6)          | 14.0                      |                              | 11 (39.3)         | 19.0                      |                          |
| T4                                   | 0 (0.0)            | -                         |                          | 2 (0.3)            | -                         |                          | 1 (0.4)                  | -                         |                          | 0 (0.0)            | -                         |                              | 0 (0.0)           | -                         |                          |
| Unknown                              | 0 (0.0)            |                           |                          | 4 (0.8)            |                           |                          | 0 (0.0)                  |                           |                          | 0 (0.0)            | -                         |                              | 0 (0.0)           | -                         |                          |
| <b>N Stage (AJCC 8<sup>th</sup>)</b> |                    |                           |                          |                    |                           |                          |                          |                           |                          |                    |                           |                              |                   |                           |                          |
| N0                                   | 101 (27.6)         | 47.7                      | <0.001                   | 169 (32.6)         | 22.2                      | <0.001                   | 85 (30.0)                | 61.1                      | <0.001                   | 14 (13.6)          | 55.0                      | 0.007                        | 7 (25.0)          | NR                        | 0.041                    |
| N1                                   | 149 (40.7)         | 19.0                      |                          | 228 (44.0)         | 20.3                      |                          | 116 (41.0)               | 33.1                      |                          | 33 (32.0)          | 51.0                      |                              | 8 (28.6)          | NR                        |                          |
| N2                                   | 116 (31.7)         | 22.4                      |                          | 109 (21.0)         | 16.0                      |                          | 82 (29.0)                | 23.9                      |                          | 56 (54.4)          | 22.0                      |                              | 13 (46.4)         | 13.0                      |                          |
| Unknown                              | 0 (0.0)            |                           |                          | 12 (2.3)           |                           |                          | 0 (0.0)                  |                           |                          | 0 (0.0)            |                           |                              | 0 (0.0)           |                           |                          |
| <b>Tumor Differentiation</b>         |                    |                           |                          |                    |                           |                          |                          |                           |                          |                    |                           |                              |                   |                           |                          |
| I / Well                             | 30 (8.2)           | 36.3                      | <0.001                   | 41 (7.9)           | 35.4                      | 0.039                    | 14 (4.9)                 | 46.4                      | 0.059                    | 5 (4.8)            | 30.0                      | 0.480                        | 1(3.6)            | NR                        | 0.271                    |
| II / Moderate                        | 229 (62.6)         | 25.0                      |                          | 340 (65.6)         | 21.0                      |                          | 186 (65.7)               | 34.1                      |                          | 62 (60.2)          | 30.0                      |                              | 6 (21.4)          | NR                        |                          |
| III / Poor                           | 100 (27.3)         | 17.1                      |                          | 130 (25.1)         | 17.0                      |                          | 76 (26.9)                | 26.5                      |                          | 35 (34.0)          | 19.0                      |                              | 21 (75.0)         | 17.0                      |                          |
| IV / undifferentiated                | 0 (0.0)            | -                         |                          | 5 (1.0)            | 13.0                      |                          | 0 (0.0)                  | -                         |                          | 0 (0.0)            | -                         |                              | 0 (0.0)           | -                         |                          |
| Unknown                              | 7 (1.9)            | -                         |                          | 2 (0.4)            |                           |                          | 7 (2.5)                  |                           |                          | 1 (1.0)            | -                         |                              | 0 (0.0)           |                           |                          |
| <b>Resection margin†</b>             |                    |                           |                          |                    |                           |                          |                          |                           |                          |                    |                           |                              |                   |                           |                          |
| Clear                                | 119 (32.5)         | 36.7                      | <0.001                   | 338 (65.3)         | 23.7                      | <0.001                   | 123 (43.5)               | 54.2                      | 0.001                    | 59 (57.3)          | 48.0                      | 0.002                        | 12 (42.9)         | NR                        | 0.134                    |
| Involved                             | 247 (67.5)         | 20.1                      |                          | 180 (15.4)         | 15.4                      |                          | 160 (56.5)               | 26.2                      |                          | 44 (42.7)          | 22.0                      |                              | 16 (57.1)         | 14.0                      |                          |
| <b>Tumor Location</b>                |                    |                           |                          |                    |                           |                          |                          |                           |                          |                    |                           |                              |                   |                           |                          |
| Head / Uncinate                      | 328 (89.6)         | 23.0                      | 0.004                    | 426 (82.2)         | 22.0                      | <0.001                   | 268 (94.7)               | 30.2                      | 0.055                    | 87 (84.5)          | 29.0                      | 0.848                        |                   |                           |                          |
| Body / Tail                          | 38 (10.4)          | 39.0                      |                          | 92 (17.8)          | 12.1                      |                          | 15 (5.3)                 | 40.2                      |                          | 16 (15.5)          | 23.0                      |                              |                   |                           |                          |

\*CPR = complete pathological response; † = Margin status defined as original pathology report for each cohort (see methods)



| <b>Supplementary Table 2: The association of clinicopathological features and molecular subtype</b> |                                                    |                                        |                                        |
|-----------------------------------------------------------------------------------------------------|----------------------------------------------------|----------------------------------------|----------------------------------------|
|                                                                                                     | <b>Classical Pancreatic<br/><i>n</i> = 330 (%)</b> | <b>Squamous<br/><i>n</i> = 112 (%)</b> | <b><i>P</i>-value<br/>(Chi-square)</b> |
| <b>T - stage</b>                                                                                    |                                                    |                                        |                                        |
| T1                                                                                                  | 63 (19.1)                                          | 8 (7.3%)                               | 0.013                                  |
| T2                                                                                                  | 192 (58.4)                                         | 72 (65.5%)                             |                                        |
| T3                                                                                                  | 74 (22.5)                                          | 30 (27.3%)                             |                                        |
| <b>N - stage</b>                                                                                    |                                                    |                                        |                                        |
| N0                                                                                                  | 69 (21.0)                                          | 23 (20.7)                              | 0.860                                  |
| N1                                                                                                  | 121 (36.8)                                         | 38 (34.2)                              |                                        |
| N2                                                                                                  | 139 (42.2)                                         | 50 (45.0)                              |                                        |
| <b>Tumor location</b>                                                                               |                                                    |                                        |                                        |
| Head                                                                                                | 276 (88.7)                                         | 79 (76.7)                              | 0.002                                  |
| Body / Tail                                                                                         | 35 (11.3)                                          | 24 (23.3)                              |                                        |
| <b>Grade / Differentiation</b>                                                                      |                                                    |                                        |                                        |
| I / II                                                                                              | 230 (70.1)                                         | 47 (42.7)                              | <0.001                                 |
| III / IV                                                                                            | 98 (29.9)                                          | 63 (57.3)                              |                                        |
| <b>Perineural Invasion</b>                                                                          |                                                    |                                        |                                        |
| Negative                                                                                            | 38 (11.7)                                          | 21 (19.1)                              | 0.049                                  |
| Positive                                                                                            | 288 (88.3)                                         | 89 (80.9)                              |                                        |
| <b>Lymphovascular invasion</b>                                                                      |                                                    |                                        |                                        |
| Negative                                                                                            | 168 (52.2)                                         | 45 (40.9)                              | 0.041                                  |
| Positive                                                                                            | 154 (47.8)                                         | 65 (59.1)                              |                                        |
| <b>Margin R1 = 1mm</b>                                                                              |                                                    |                                        |                                        |
| Negative                                                                                            | 92 (43.4)                                          | 26 (37.1)                              | 0.358                                  |
| Positive                                                                                            | 120 (56.6)                                         | 44 (62.9)                              |                                        |
| <b>Margin R1 = 0mm</b>                                                                              |                                                    |                                        |                                        |
| Negative                                                                                            | 193 (70.7)                                         | 61 (66.3)                              | 0.428                                  |
| Positive                                                                                            | 80 (29.3)                                          | 31 (33.7)                              |                                        |

| Supplementary Table 3: Molecular subtype cohort univariate survival analysis |                     |          |
|------------------------------------------------------------------------------|---------------------|----------|
|                                                                              | Univariate Analysis |          |
|                                                                              | HR (95% CI)         | <i>P</i> |
| Tumour Grade (High vs low)                                                   | 1.57 (1.24 – 1.99)  | <0.001   |
| Margin Involvement (R1<sub>1mm</sub>)                                        | 2.03 (1.51 – 2.73)  | <0.001   |
| Lymphovascular Invasion (Positive)                                           | 1.88 (1.49 – 2.37)  | <0.001   |
| Perineural Invasion (Positive)                                               | 1.56 (1.09 – 2.22)  | 0.014    |
| Lymph Node stage 8 <sup>th</sup> N1                                          | 1.36 (0.96 – 1.92)  | 0.082    |
| Lymph Node stage 8 <sup>th</sup> N2                                          | 2.34 (1.89 – 3.26)  | <0.001   |
| T stage (8 <sup>th</sup> edition) T2                                         | 1.54 (1.09 – 2.17)  | 0.013    |
| T stage (8 <sup>th</sup> edition) T3                                         | 2.29 (1.56 – 3.35)  | <0.001   |
| Adjuvant Chemotherapy                                                        | 0.68 (0.51 – 0.90)  | 0.008    |
| Tumor Location (Body/Tail vs Head)                                           | 1.45 (1.05 – 1.99)  | 0.023    |
| Molecular Subtype (Squamous vs Classical)                                    | 1.98 (1.54 – 2.56)  | <0.001   |

| Supplementary Table 4: Molecular subtype cohort multivariate survival analysis |                       |          |
|--------------------------------------------------------------------------------|-----------------------|----------|
|                                                                                | Multivariate Analysis |          |
|                                                                                | HR (95% CI)           | <i>P</i> |
| <i>Step 1</i>                                                                  |                       |          |
| T stage – T2                                                                   | 1.14 (0.62 – 2.11)    | 0.676    |
| T3                                                                             | 1.58 (0.81 – 3.08)    | 0.179    |
| Lymph Node – N1                                                                | 1.14 (0.68 – 1.90)    | 0.632    |
| N2                                                                             | 1.54 (0.89 – 2.65)    | 0.121    |
| Grade (High grade)                                                             | 1.61 (1.10 – 2.35)    | 0.015    |
| Perineural Invasion                                                            | 1.07 (0.63 – 1.82)    | 0.79     |
| Lymphovascular Invasion                                                        | 1.83 (1.24 – 2.71)    | 0.003    |
| Tumor Location (body/tail)                                                     | 1.83 (1.12 – 2.97)    | 0.015    |
| Adjuvant Therapy                                                               | 0.63 (0.44 – 0.90)    | 0.012    |
| Margin (R1 = 1mm)                                                              | 1.45 (0.96 – 2.20)    | 0.076    |
| Molecular Subtype (Squamous)                                                   | 1.50 (1.00 – 2.25)    | 0.051    |
| <i>STEP 2</i>                                                                  |                       |          |
| T stage – T2                                                                   | 1.14 (0.62 – 2.12)    | 0.672    |
| T3                                                                             | 1.59 (0.81 – 3.09)    | 0.176    |
| Lymph Node – N1                                                                | 1.13 (0.68 – 1.90)    | 0.637    |
| N2                                                                             | 1.54 (0.90 – 2.66)    | 0.119    |
| Grade (High grade)                                                             | 1.61 (1.10 – 2.35)    | 0.015    |
| Lymphovascular Invasion                                                        | 1.86 (1.29 – 2.69)    | 0.001    |
| Tumor Location (body/tail)                                                     | 1.83 (1.13 – 2.98)    | 0.015    |
| Adjuvant Therapy                                                               | 0.63 (0.44 – 0.91)    | 0.013    |
| Margin (R1 = 1mm)                                                              | 1.48 (1.00 – 2.19)    | 0.049    |
| Molecular Subtype (Squamous)                                                   | 1.49 (1.00 – 2.22)    | 0.053    |
| <i>Step 3 – Final Model</i>                                                    |                       |          |
| Lymph Node – N1                                                                | 1.21 (0.73 – 2.01)    | 0.47     |
| N2                                                                             | 1.68 (0.98 – 2.86)    | 0.058    |
| Grade (High grade)                                                             | 1.66 (1.15 – 2.42)    | 0.007    |
| Lymphovascular Invasion                                                        | 1.85 (1.28 – 2.68)    | 0.001    |
| Tumor Location (body/tail)                                                     | 1.99 (1.24 – 3.22)    | 0.005    |
| Adjuvant Therapy                                                               | 0.63 (0.44 – 0.90)    | 0.010    |
| Margin (R1 = 1mm)                                                              | 1.50 (1.01 – 2.21)    | 0.044    |
| Molecular Subtype (Squamous)                                                   | 1.54 (1.04 – 2.28)    | 0.032    |

| Supplementary Table 5: Classical subtype multivariate survival analysis |                     |          |
|-------------------------------------------------------------------------|---------------------|----------|
| <i>Final Model</i>                                                      |                     |          |
|                                                                         | Univariate Analysis |          |
|                                                                         | HR (95% CI)         | <i>P</i> |
| Tumor Grade (High vs low)                                               | 2.26 (1.44 – 3.54)  | <0.001   |
| Margin Involvement (R1<sub>1mm</sub>)                                   | 2.10 (1.40 – 3.17)  | <0.001   |
| Lymphovascular Invasion (Positive)                                      | 2.46 (1.62 – 3.73)  | <0.001   |
| T stage (8 <sup>th</sup> edition) T2                                    | 1.15 (0.61 – 2.16)  | 0.665    |
| T stage (8 <sup>th</sup> edition) T3                                    | 2.23 (1.14 – 4.35)  | 0.019    |
| Adjuvant Chemotherapy                                                   | 0.62 (0.40 – 0.95)  | 0.028    |

| Supplementary Table 6: Squamous subtype multivariate survival analysis |                     |          |
|------------------------------------------------------------------------|---------------------|----------|
| <i>Final Model</i>                                                     |                     |          |
|                                                                        | Univariate Analysis |          |
|                                                                        | HR (95% CI)         | <i>P</i> |
| Perineural Invasion (Positive)                                         | 1.98 (0.89 – 4.40)  | 0.095    |
| Tumor Location (Body/Tail vs Head)                                     | 2.46 (1.17 – 5.17)  | 0.018    |
| Adjuvant Chemotherapy                                                  | 0.55 (0.29 – 1.07)  | 0.079    |

| Supplementary Table 7: The association of adjuvant therapy and molecular subtype (only showing for those with known accurate adjuvant data) |                                            |                               |                                 |
|---------------------------------------------------------------------------------------------------------------------------------------------|--------------------------------------------|-------------------------------|---------------------------------|
|                                                                                                                                             | Classical Pancreatic<br><i>n</i> = 261 (%) | Squamous<br><i>n</i> = 82 (%) | <i>P</i> -value<br>(Chi-square) |
| <b>Adjuvant Chemotherapy</b>                                                                                                                |                                            |                               |                                 |
| Yes                                                                                                                                         | 194 (74.3)                                 | 51 (62.2)                     | 0.025                           |
| No                                                                                                                                          | 67 (25.7)                                  | 31 (37.8)                     |                                 |
| <b>Chemotherapy Agent</b>                                                                                                                   |                                            |                               | 0.396                           |
| Gemcitabine based                                                                                                                           | 4 (3.5)                                    | 2 (6.3)                       |                                 |
| Other                                                                                                                                       | 109 (96.5)                                 | 30 (93.8)                     |                                 |

| Supplementary Table 8: The association of neoadjuvant therapy and molecular subtype (only showing for those who received neoadjuvant therapy) |                                           |                              |                                 |
|-----------------------------------------------------------------------------------------------------------------------------------------------|-------------------------------------------|------------------------------|---------------------------------|
|                                                                                                                                               | Classical Pancreatic<br><i>n</i> = 13 (%) | Squamous<br><i>n</i> = 3 (%) | <i>P</i> -value<br>(Chi-square) |
| <b>Neoadjuvant Therapy</b>                                                                                                                    |                                           |                              |                                 |
| FOLFIRINOX                                                                                                                                    | 0 (0.0)                                   | 1 (33.3)                     | 0.376                           |
| Gemcitabine                                                                                                                                   | 4 (30.8)                                  | 0 (0.0)                      |                                 |
| Gemcitabine / 5FU ChemoRad                                                                                                                    | 3 (23.1)                                  | 1 (33.3)                     |                                 |
| Gemcitabine / Abraxane                                                                                                                        | 3 (23.1)                                  | 0 (0.0)                      |                                 |
| Unknown                                                                                                                                       | 3 (23.1)                                  | 1 (33.3)                     |                                 |
|                                                                                                                                               |                                           |                              |                                 |

## Supplementary Figures

## Figure Legends

**Supplementary Figure 1:** Kaplan-Meier survival curves for all patient cohorts stratified by (a – d) T-stage, (e – h) N-stage according to the AJCC 8<sup>th</sup> staging criteria and (i – l) resection margin status. The Verona and Milan cohorts were combined

**Supplementary Figure 2:** Kaplan-Meier survival curves for all patients stratified by AJCC 8<sup>th</sup> staging criteria T-status (a - b), lymph node status (c - d) in both margin negative (a, c) and positive (b, d) patients.

**Supplementary Figure 3:** Kaplan-Meier survival curves for the molecular subtype cohort stratified by molecular subtype (squamous vs classical pancreatic) in both Margin negative (a) and margin positive (b) groups. Margin status defined as  $R1_{\leq 1\text{mm}}$ . Molecular subtype is prognostic in both margin positive and negative groups.

**Supplementary Figure 4:** Kaplan-Meier survival curves for the molecular subtype cohort stratified by lymph node involvement and margin status  $R1_{0\text{mm}}$ . Lymph node involvement is prognostic in (a) the entire cohort and (b) the Classical Pancreatic subtype, but not (c) in the Squamous subtype. Positive resection margin is prognostic in (d) the entire cohort and (e) the Classical Pancreatic subtype, but not in (f) the Squamous subtype.

**Supplementary Figure 5:** Kaplan-Meier survival curve for the molecular subtype cohort stratified by administration of adjuvant therapy. Irrespective of adjuvant therapy, squamous subtype had significantly worse prognosis.

**Supplementary Figure 6:** Kaplan-Meier survival curves for the molecular subtype stratified by S100A2 / A4 expression, lymph node status (a – c) and margin status (d-f). Margin status defined as  $R1_{\leq 1\text{mm}}$ . Biomarker status was determined using immunohistochemistry, and defined as both negative, either S100A2 or A4 positive or both biomarkers positive.



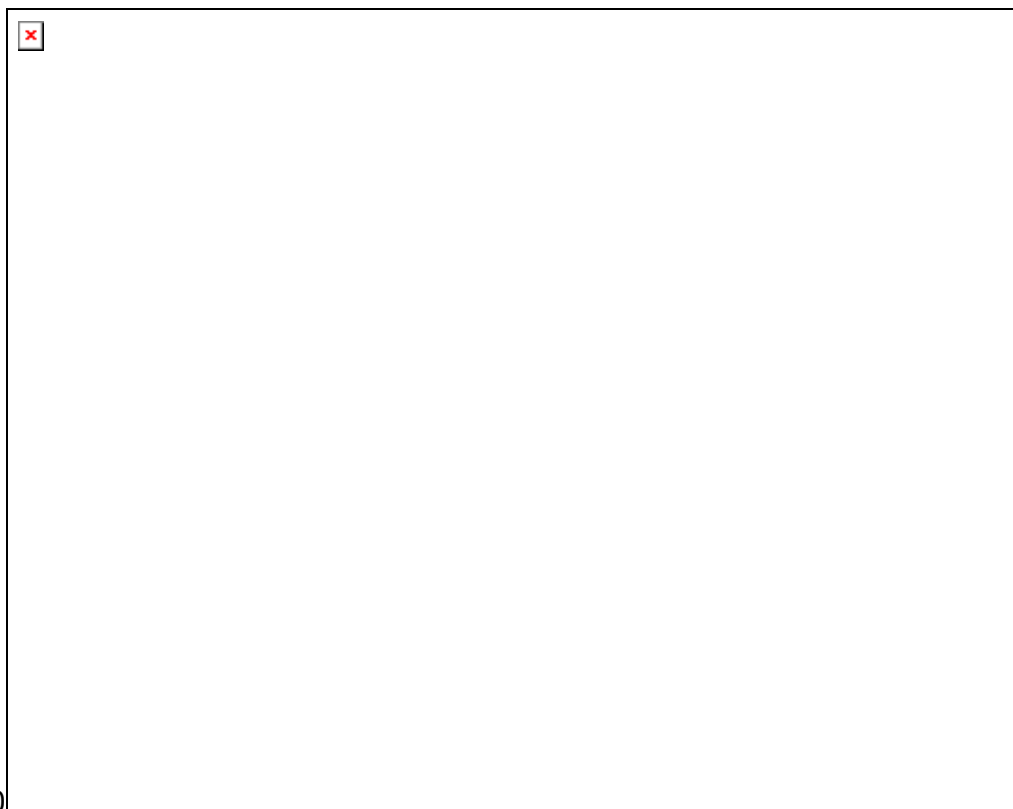

251658240

**Supplementary**

**Figure**

**1**





251658240

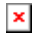

**Supplementary Figure 2**

**251658240**

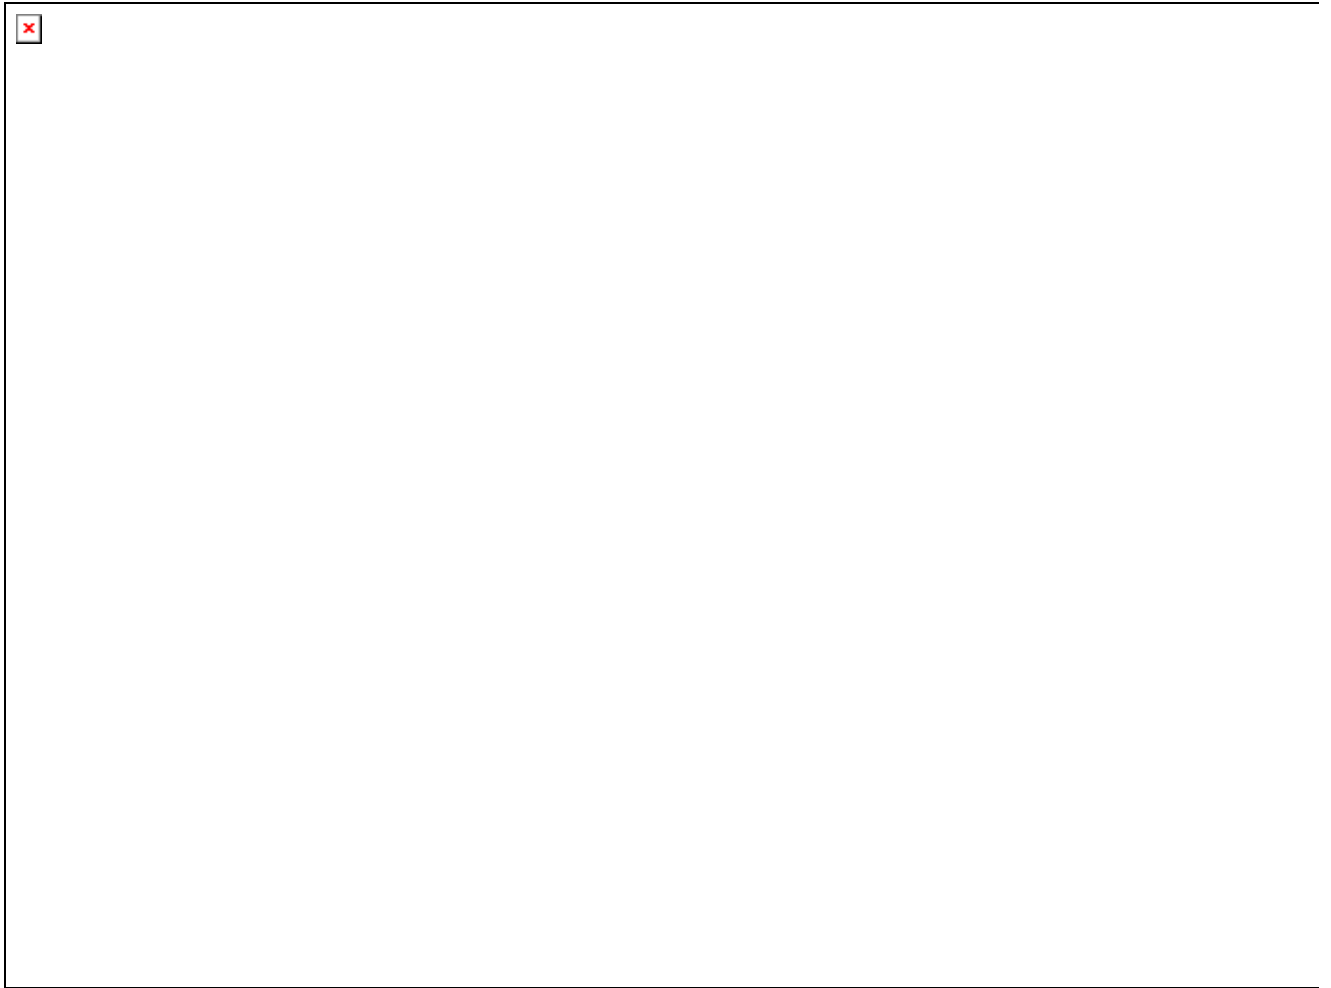

**Supplementary Figure 3**

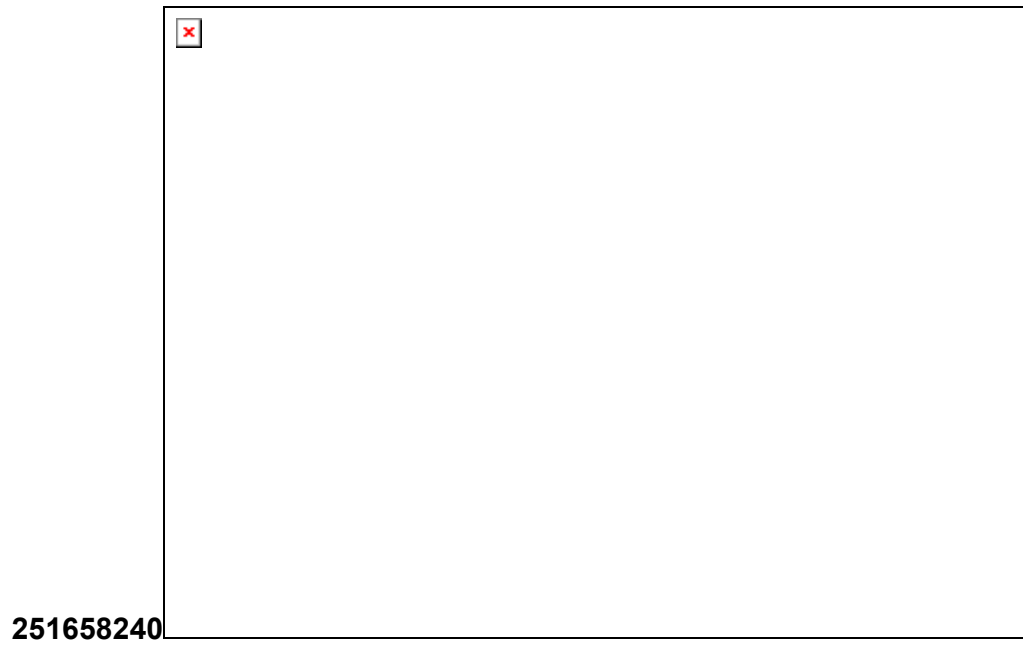

**Supplementary Figure 4**

**251658240**

---

ChartDescription automatically generated

**Supplementary Figure 5**

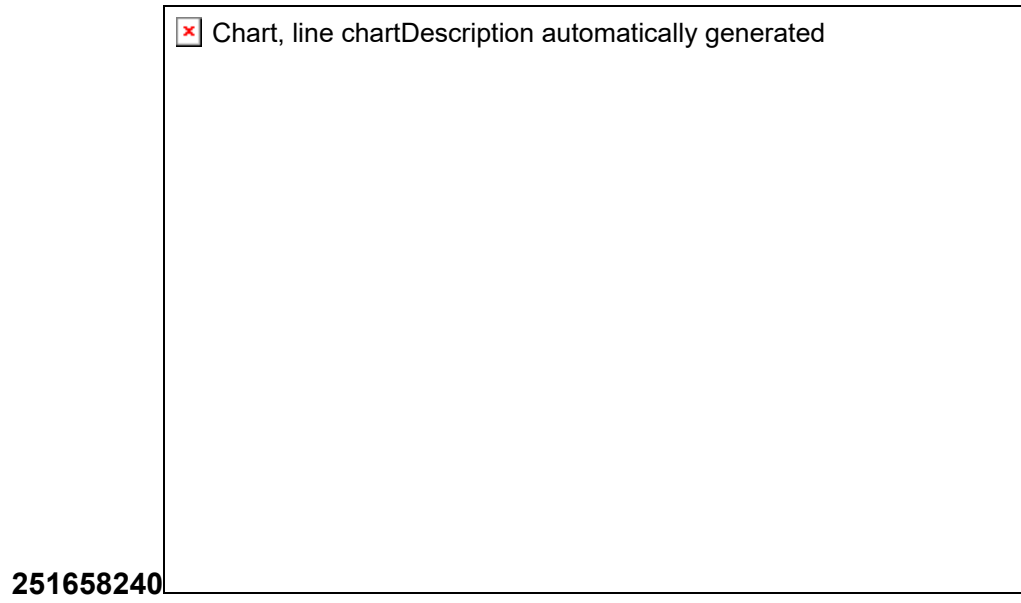

**Supplementary Figure 6**
